# Supplementary material for: Heterobimetallic peroxo-titanium(iv) nitrilotriacetate complexes as single source precursors for preparation of MTiO3 (M = Co, Ni and Zn)
Source: Royal Society of Chemistry journal article supplement (doi:10.1039/b920987e), 2010-01-01

## Supporting Information

---

### Heterobimetallic peroxo-titanium(IV) nitrilotriacetate complexes as single source precursors for preparation of MTiO<sub>3</sub> (M =Co, Ni and Zn)

---

Yuan-Fu Deng<sup>a,\*</sup>, Qi-Ying Lv<sup>a</sup>, Song-Ping Wu<sup>a</sup>, Shu-zhong Zhan<sup>a</sup>

<sup>a</sup> Department of Chemistry, College of Chemistry and Chemical Engineering, South China University of Technology, Guangzhou, 510640, China

#### Figure Captions

**Figure S1.** The IR spectrum of [M(H<sub>2</sub>O)<sub>5</sub>]<sub>2</sub>[Ti<sub>2</sub>(O<sub>2</sub>)<sub>2</sub>O(nta)<sub>2</sub>]•7H<sub>2</sub>O [M = Co (**1**), Ni (**2**) and Zn (**3**)].

**Figure S2.** TG-DTA curves for [Ni(H<sub>2</sub>O)<sub>5</sub>]<sub>2</sub>[Ti<sub>2</sub>(O<sub>2</sub>)<sub>2</sub>O(nta)<sub>2</sub>]•7H<sub>2</sub>O (**2**) with heating rate of 10 °C/min.

**Figure S3.** TG-DTA curves for [Zn (H<sub>2</sub>O)<sub>5</sub>]<sub>2</sub>[Ti<sub>2</sub>(O<sub>2</sub>)<sub>2</sub>O(nta)<sub>2</sub>]•7H<sub>2</sub>O (**3**) with heating rate of 10 °C/min

**Figure S1**

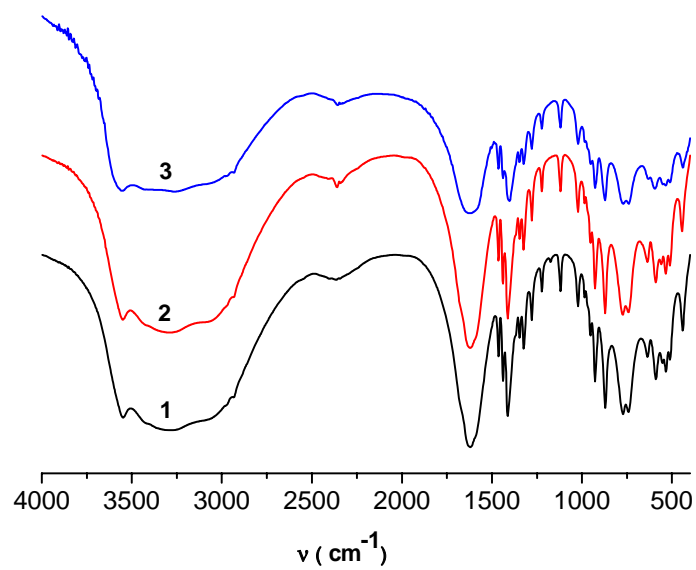

**Figure S2**

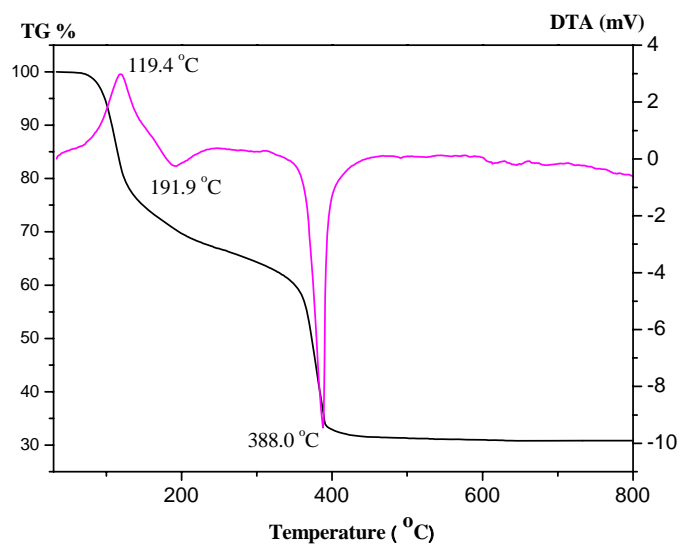

**Figure S3**

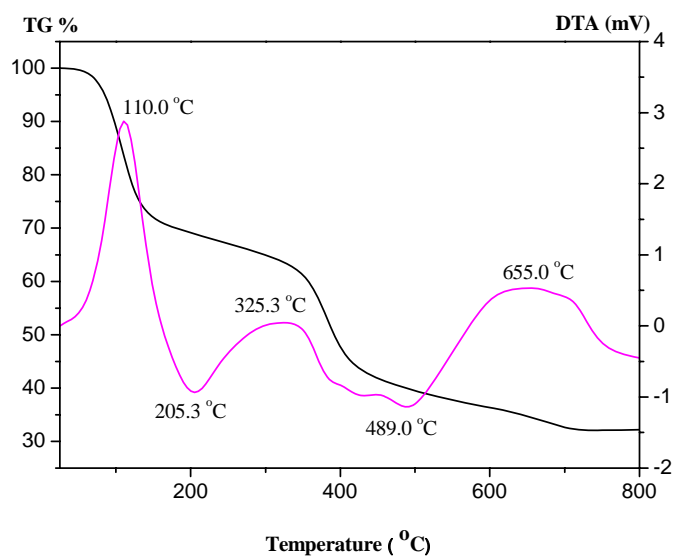

Supplement: b920987e.pdf [file b920987e.pdf]
